# Supplementary material for: A realist exploration of co-designed practice-placement models that ‘worked’ in shifting contexts of allied health industry, workforce and policy
Source: Research Square preprint supplement (doi:10.21203/rs.3.rs-7266234/v1), 2025-08-19
Supplement: Supplementary file 2 [file dc65be614beb77a9342cc1b8.docx]

Supplementary File 3

Placement Dimensions template

*Thinking through non-traditional supervision structures that are appropriate, safe and time-efficient for all involved*

There are many factors which influence how placement educators might supervise their students to ensure that they deliver a quality service to their clients. In these examples, there may be different levels of supervision provided to students; for instance, a final year student will require significantly less support than a first year student, and this would to some extent be reflected in the way services are structured and billed for. It is assumed that these are appropriate and realistic according to the context of the population and service delivery. The ability of placement educators to measure the appropriateness of these activities are often supported by competency measures provided by the university. It is also recommended in these instances that placement educators have explained the financial implications of student-led services to NDIS participants groups, including the level of supervision students would receive, and gained the client’s consent. Supervision options vary:

- Type:
  - direct supervision all of the time or part of the time
  - in person or via e-supervision
  - indirect via briefing and debriefing
- Uni or interdisciplinary or a combination.

Mentoring and peer structured placements are two examples. A mentoring placement involves senior and junior roster students being scheduled for placement together, and the senior students provide some supervision of the junior students. It can include cross-discipline mentoring. A peer structured placement involves students at the same experience level working together across disciplines. As part of developing both structures, a liaison meeting between relevant service contacts and the university coordinators is advised, to discuss how the structure could be nuanced for your particular context; outline roles and responsibilities of those involved; learning outcomes for students; and processes for documentation and communication (including with NDIS recipients).

*Developing effective orientations so students can start learning as soon as they arrive*

University stakeholders should communicate clearly with you about what they expect with regard to supervision, teaching and assessment prior to the placement commencing – as well as what students already know. They may have access to resources for supporting student orientation. The guiding principles of the NDIS have had a big impact on how services are organised and delivered; and further implications for students. These resources might be helpful for reflecting on what students need to know when they start placement: video and resource. Within a mentoring placement, more senior or experienced students might be able to play a role in providing orientation.

Successful collaboration to structure placements needs flexibility, so it is always important to communicate what your service requires or prefers with regard to timing and length of student placements. The way placements are structured differs across disciplines and universities. Through collaborating with university stakeholders, you can hope to develop a plan that works for your service, participants, and the students.

Placement options do vary. There are different types:

- Professional experience
- Observation
- Quality improvement
- Projects
- Research

And, there are also different timing/s:

- Intensity: 1 to 5 days per week
- Length: anything from one week to 20 weeks or more
- Calendar: in, out of, or across university semesters
- Day: inside or out of 9-5. This can be negotiated with students at the start of the placement, and can go a long way in making sure that the services students are involved with match the needs of NDIS participants.

The learning stage of the student (i.e. year level and placement number) can have an impact on different elements of the timing, for example intensity or length. Some of these requirements might be non-negotiable, and this information can be gained from the placement liaison at the university. It is highly likely there will be an option that will work for what you have in mind where students may be able to help you create, trial or deliver desired NDIS services. For a full time placement block, you could even share students with another service provider; or, you could structure in a clinic supported by students and negotiate to have a consistent stream of students.

The setting/s in which services are provided are unique to each provider, and often, to each participant. Allied health students are bright, capable and highly motivated. They can be an amazing and valuable resource for your service and NDIS participants.

Explore the options:

- What would make a difference to the people you provide services to?
- How would you like your services to be different?
- What do you wish you could offer but currently can’t?
- How would you like to make your service participants’ experience better?
- What would improve outcomes for your service participants?
- Could travel time be used more effectively when students are involved; for debrief, reflection, orientation or discussion of new ideas that might work for existing clients?

Students can:

- Be available when participants need the service – not just 9 to 5 or during semesters
- Be available where the participants need the service – not just in an office
- Create, trial and/or evaluate service solutions

They can assist with:

- Intensives – frequent sessions enabling delivery of evidence based interventions
- Welcome clinics and screening services
- Groups
- Specialist or specific services e.g. assessment, screenings
- Project placements – quality improvement projects, evidence based practice, investigating and developing service solutions or resources.
