# Supplementary material for: A realist exploration of co-designed practice-placement models that ‘worked’ in shifting contexts of allied health industry, workforce and policy
Source: Research Square preprint supplement (doi:10.21203/rs.3.rs-7266234/v1), 2025-08-19
Supplement: Supplementary file 3 [file dd128253c874e73fc69dc4a0.docx]

Supplementary File 1: Position Description for Placement Facilitator Role/s

| Develop and implement a range of Work-Integrated Learning (WIL) curriculum approaches and strategies for allied health students undertaking WIL placements in agencies providing services to NDIS participants. These should be tailored to individual organisations’ unique services and would include mapping WIL placement activities against required allied health competencies. Particularly, key responsibilities include:   - Working with allied health supervisors to ensure their perspective/experience informs future models of WIL placement and increases capacity for placement opportunities - Ensuring ongoing sustainability - Developing and assisting implementation of innovative models of WIL placement curriculum - Responding to NDIS participant/user choice and control and family-centred care - Advise and support placement educators in developing and implementing placement education arrangements for all students on these placements - Create and disseminate resources to support allied health practitioners to provide quality WIL experiences for students including:   - Professional development activities, resources and web-based materials   - Support students to prepare and successfully complete placements with NDIS-funded services and clients |
| --- |
